# Supplementary material for: Functional Characterization of CYP716 Family P450 Enzymes in Triterpenoid Biosynthesis in Tomato
Source: PubMed Central journal article supplement (PMC5278499; doi:10.3389/fpls.2017.00021), 2017-01-30
Supplement: Table3.pdf [file Table3.pdf]

Supplementary Table 3.  $^{13}\text{C}$  NMR spectra data of compound **8** (daturadiol).

| Assignment | $\delta^{13}\text{C}$ (ppm) compound <b>8</b><br>purified from yeast strain SY56 | $\delta^{13}\text{C}$ (ppm) daturadiol in reference<br>(Araújo and Chaves (2005)) |
|------------|----------------------------------------------------------------------------------|-----------------------------------------------------------------------------------|
| C-1        | 40.72                                                                            | 40.7                                                                              |
| C-2        | 27.40                                                                            | 27.4                                                                              |
| C-3        | 79.10                                                                            | 79.1                                                                              |
| C-4        | 39.56                                                                            | 39.6                                                                              |
| C-5        | 55.58                                                                            | 55.6                                                                              |
| C-6        | 68.72                                                                            | 68.7                                                                              |
| C-7        | 40.76                                                                            | 40.8                                                                              |
| C-8        | 38.91                                                                            | 38.9                                                                              |
| C-9        | 47.93                                                                            | 47.9                                                                              |
| C-10       | 36.42                                                                            | 36.4                                                                              |
| C-11       | 23.43                                                                            | 23.4                                                                              |
| C-12       | 122.05                                                                           | 122.0                                                                             |
| C-13       | 144.32                                                                           | 144.3                                                                             |
| C-14       | 42.33                                                                            | 42.3                                                                              |
| C-15       | 26.12                                                                            | 26.1                                                                              |
| C-16       | 26.95                                                                            | 27.0                                                                              |
| C-17       | 32.50                                                                            | 32.5                                                                              |
| C-18       | 47.24                                                                            | 47.2                                                                              |
| C-19       | 46.84                                                                            | 46.8                                                                              |
| C-20       | 31.11                                                                            | 31.4                                                                              |
| C-21       | 34.74                                                                            | 34.7                                                                              |
| C-22       | 37.13                                                                            | 37.1                                                                              |
| C-23       | 27.92                                                                            | 27.9                                                                              |
| C-24       | 17.05                                                                            | 17.0                                                                              |
| C-25       | 17.03                                                                            | 17.0                                                                              |
| C-26       | 18.37                                                                            | 18.4                                                                              |
| C-27       | 26.04                                                                            | 26.0                                                                              |
| C-28       | 28.37                                                                            | 28.3                                                                              |
| C-29       | 33.33                                                                            | 33.3                                                                              |
| C-30       | 23.69                                                                            | 23.7                                                                              |
